# Supplementary material
Source: PubMed Central journal article supplement (PMC1323482)
Supplement: plntcell_tpc.105.036707_3.pdf [file plntcell_tpc.105.036707_3.pdf]

**SOB2/DRN-like** MEEAIMRLEGAEHRETNIHSLKRKPSRTSSTAPGSPGGVTTAKAASGAGASGVSTIRYRG  
**LEP**-----MNTTSSKSKKQDDQVG-----TRFLG

**SOB2/DRN-like** VRRRPWGRYAAEIRDPLSKERHWLGTFTAEAAACAYDCAARAMRGLKARTNFVYPMPSL  
**LEP** VRRRPWGRYAAEIRDPTTKERHWLGTFTAEAAALAYDRAARSMRGT RARTNFVYSDMPP

**SOB2/DRN-like** DSYHHRI FSSPPMNMFLLRDVLNSQSLSP LTT FAYPPCNLSNVNDVVHESFTNVNDVCE  
**LEP** SSVTSIVSP-----DDPPPPPPAPPSPNDPVDYMMFNQYSSTDSFMLQPHCDQ

**SOB2/DRN-like** LSPKAKRSSTIENESLISNIFEPEPASSGLQEIVQGFLPKPISQHASIPPKSNQOSVGV  
**LEP** VDSYMFGGSSNSNSYCYSNDSSELPP--LPSDLSNSCYSPQWTWTGDDYSSEYVHSPM

**SOB2/DRN-like** FPTMPESGFQTDVRLADFHVEGNGFGQVKYHGELGWADHENGFD SAKMQQNGNGMFYQY  
**LEP** FSRMP-----VDSFPQG-----FNYFGS-----

**SOB2/DRN-like** CFHDDY  
**LEP**-----
