# Supplementary material
Source: PubMed Central journal article supplement (PMC1323482)

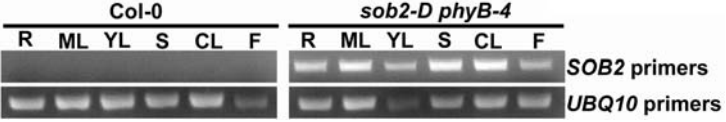

Supplement: plntcell_tpc.105.036707_1.pdf [file plntcell_tpc.105.036707_1.pdf]

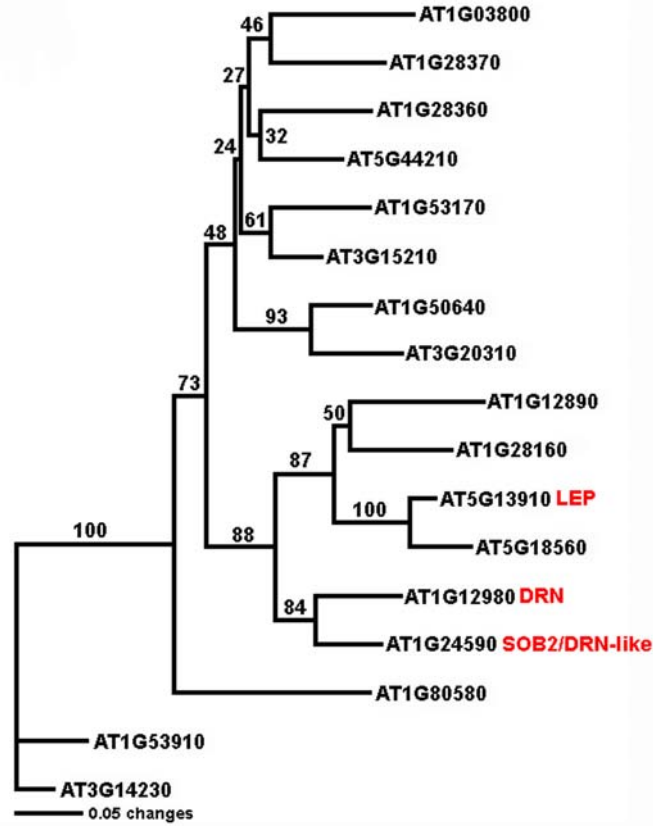

Supplement: plntcell_tpc.105.036707_2.pdf [file plntcell_tpc.105.036707_2.pdf]

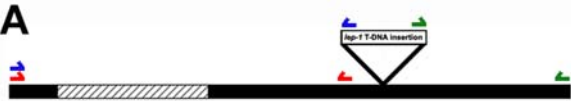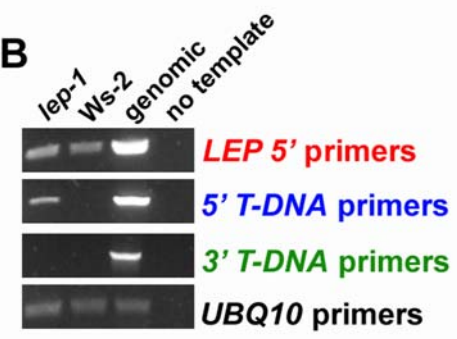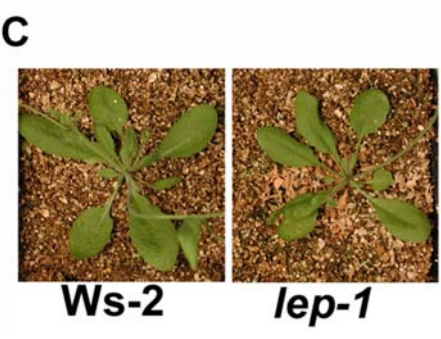

Supplement: plntcell_tpc.105.036707_4.pdf [file plntcell_tpc.105.036707_4.pdf]

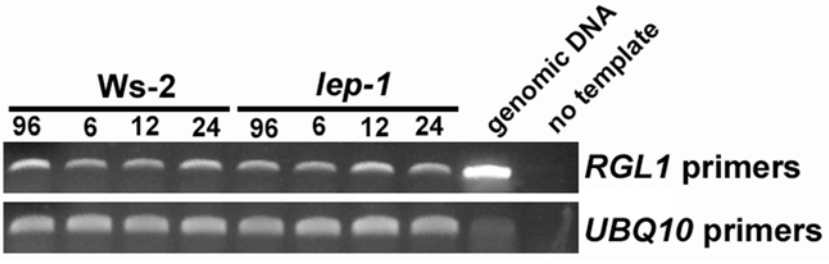

Supplement: plntcell_tpc.105.036707_5.pdf [file plntcell_tpc.105.036707_5.pdf]
